# Supplementary material
Source: PubMed Central journal article supplement (PMC4437666)
Supplement: NIHMS689108-supplement-Lim_SI_supplemental.pdf [file NIHMS689108-supplement-Lim_SI_supplemental.pdf]

## **Site-Specific Fatty Acid-Conjugation to Prolong Protein Half-Life *In Vivo***

Sung In Lim<sup>a</sup>, Yukina Mizuta<sup>b</sup>, Akinori Takasu<sup>b</sup>, Young S. Hahn<sup>c</sup>, Yong Hwan Kim<sup>d</sup>, and Inchan Kwon<sup>a,\*</sup>

<sup>a</sup>Department of Chemical Engineering, University of Virginia, VA 22904; <sup>b</sup>Department of Frontier Materials, Nagoya Institute of Technology, Nagoya 466-8555, Japan; <sup>c</sup>Department of Microbiology, University of Virginia, VA 22908; <sup>d</sup>Department of Chemical Engineering, Kwangwoon University, Seoul 139-701, Korea

## **Supplementary Information (SI)**

## NGFLPWPPLTNR $Z$ K (residues 26-39; $Z$ = pEthF)

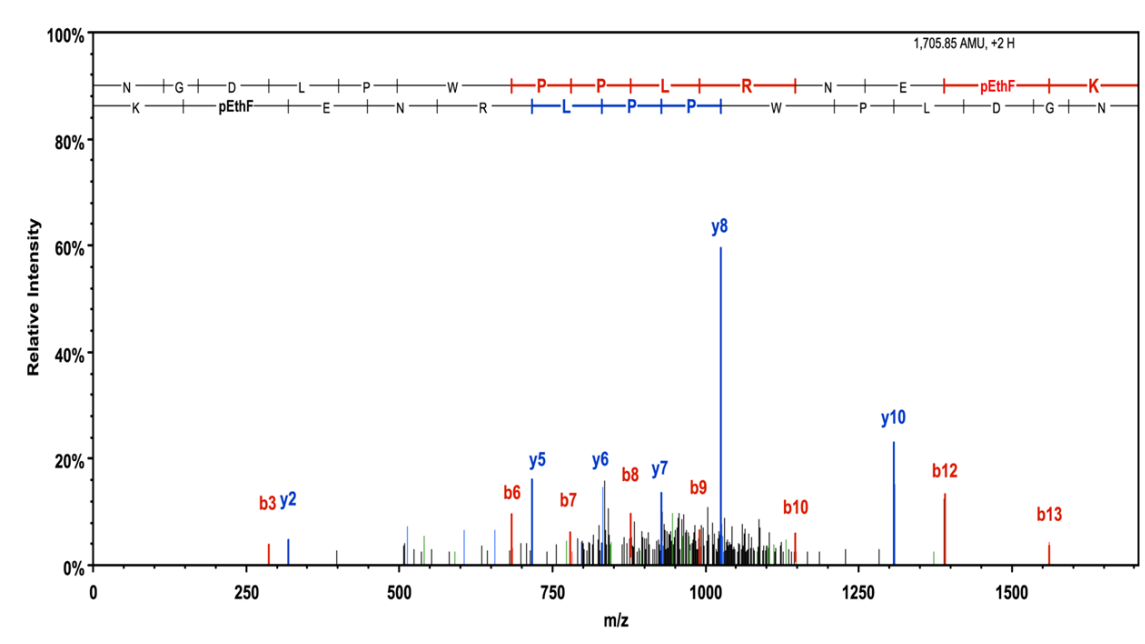

**Supplementary Fig. S1.** Liquid chromatography tandem MS of Peptide Z38 ( $m/z = 1706.8$ , NGDLPWPPLRNEAZK) of the mDHFR-pEthF (Fig. 2). The system consisted of a Thermo Electron LTQ Orbitrap XL mass spectrometer interfaced to a Phenomenex Jupiter C18. The analysis was performed by acquiring a mass spectrum using Fourier transform ion cyclotron resonance.

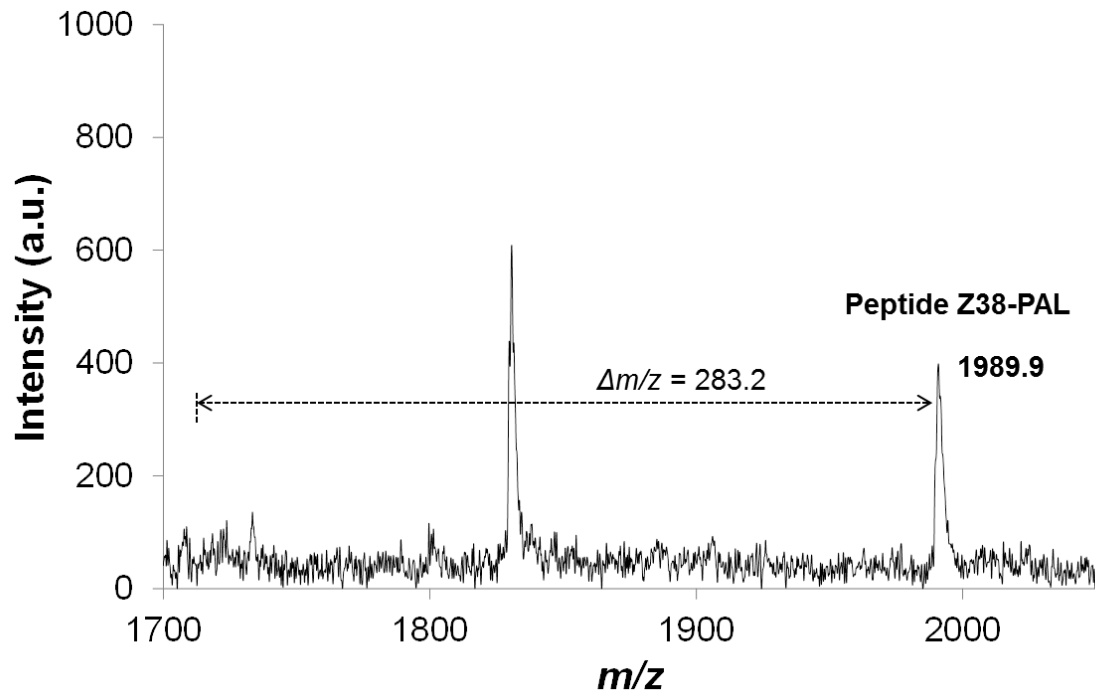

**Supplementary Fig. S2.** Confirmation of the palmitic acid-conjugation to the mDHFR-pEthF by MALDI-TOF MS. Peptide Z38-PAL, one of tryptic digests of the mDHFR-Pal, was detected at a mass of 1989.9.

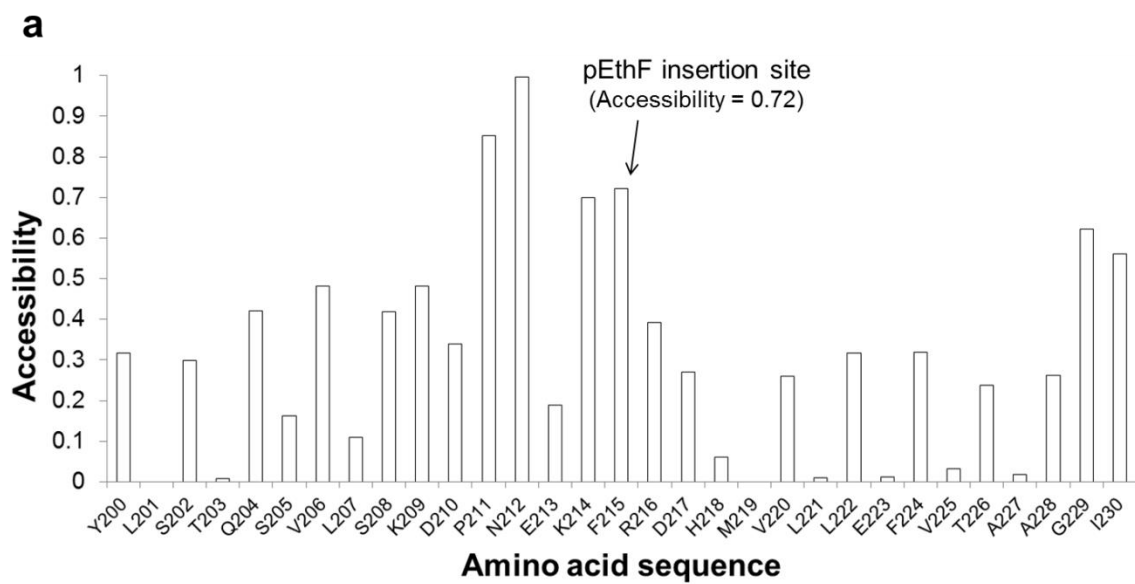

**b**

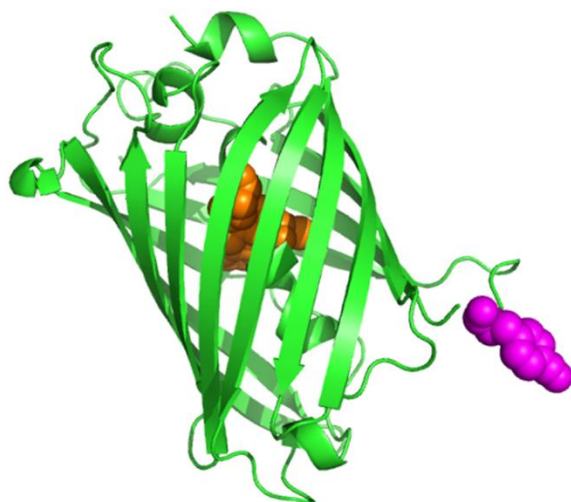

**Supplementary Fig. S3.** Determination of an optimal site for mutagenesis. (a) Residue-based solvent accessibility of the sfGFP-pEthF. ASAView [1], an online tool for a graphical representation of solvent accessibility, was used to calculate the relative solvent accessibility of all residues including pEthF at 215<sup>th</sup> position, based on the PDB file (ID: 2B3P) of sfGFP and a fully automated protein structure homology-modeling server [2] for mutation. (b) Three-dimensional structure of the sfGFP-pEthF generated by Pymol [3]. The chromophore (orange) and pEthF incorporated at the 215<sup>th</sup> position (magenta) are represented by spheres.

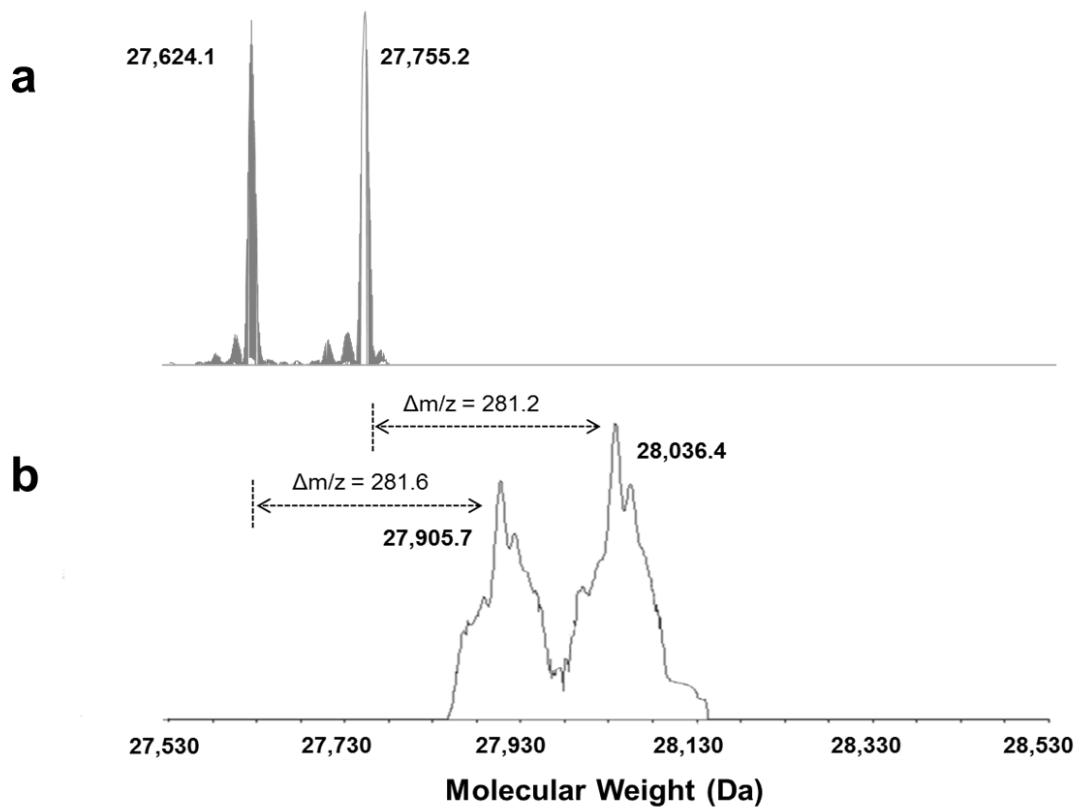

**Supplementary Fig. S4.** Confirmation of the palmitic acid-conjugation to the sfGFP-pEthF by ESI-MS. ESI-MS spectrum of the sfGFP-pEthF (a) and the sfGFP-Pal (b). Following the reversed-phase high performance chromatography using BEH C4 column ( $2.1 \times 100$  mm,  $1.7 \mu\text{m}$ ), the molecular weight of a full length protein was analyzed on an LTQ-Orbitrap XL mass spectrometer.

## References

- [1] S. Ahmad, M. Gromiha, H. Fawareh, A. Sarai, ASAView: database and tool for solvent accessibility representation in proteins. *BMC Bioinformatics* 5 (2004) 51.
- [2] K. Arnold, L. Bordoli, J. Kopp, T. Schwede, The SWISS-MODEL workspace: a web-based environment for protein structure homology modelling. *Bioinformatics* 22(2) (2006) 195-201.
- [3] The PyMOL Molecular Graphics System, Version 1.2r1 Schrödinger, LLC.
